# Supplementary material for: A comparative study on the possible zinc binding sites of the human ZnT3 zinc transporter protein
Source: Royal Society of Chemistry journal article supplement (doi:10.1039/c3dt50754h), 2013-01-01
Supplement: c3dt50754h.pdf [file c3dt50754h.pdf]

## Supplementary information for

Dávid Árus, Ágnes Dancs, Nóra Veronika Nagy, Tamás Gajda \*

### A comparative study on the possible zinc binding sites of the human ZnT3 zinc transporter protein

**Table S1:** EPR data of the complexes formed in the copper(II)-L<sup>1</sup> system

| Species                                                                                          | $g_{xx}$ | $g_{yy}$ | $g_{zz}$ | $A_{xx}/G$ | $A_{yy}/G$ | $A_{zz}/G$ |
|--------------------------------------------------------------------------------------------------|----------|----------|----------|------------|------------|------------|
| Cu <sup>2+</sup>                                                                                 | 2.082    | 2.082    | 2.425    | 8.3        | 8.3        | 111.5      |
| CuHL <sup>1</sup>                                                                                | 2.062    | 2.062    | 2.330    | 10.0       | 10.0       | 140.0      |
| CuL <sup>1</sup>                                                                                 | 2.058    | 2.058    | 2.274    | 23.8       | 23.8       | 165.2      |
| CuH <sub>1</sub> L <sup>1</sup>                                                                  | 2.051    | 2.051    | 2.240    | 32.0       | 32.0       | 180.0      |
| CuH <sub>2</sub> L <sup>1</sup>                                                                  | 2.036    | 2.044    | 2.209    | 15.4       | 33.2       | 184.5      |
| CuH <sub>3</sub> L <sup>1</sup>                                                                  | 2.031    | 2.046    | 2.188    | 20.1       | 35.2       | 192.8      |
| Cu <sub>2</sub> H <sub>2</sub> L <sup>1</sup>                                                    |          |          |          | 55.6       |            |            |
| Cu <sub>2</sub> H <sub>3</sub> L <sup>1</sup>                                                    |          |          |          | 70.0       |            |            |
| Cu <sub>2</sub> H <sub>4</sub> L <sup>1</sup>                                                    |          |          |          | 63.5       |            |            |
| Cu <sub>2</sub> H <sub>5</sub> L <sup>1</sup> +<br>Cu <sub>2</sub> H <sub>6</sub> L <sup>1</sup> |          |          |          | 47.3       |            |            |

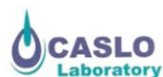

#### HPLC Certificate

**Lot No.** P220410-04-01  
**PLC Column** Agela (250×4.6mm I.D.) C18  
**Detection wavelength** 220 nm  
**Gradient** 3-23%B in 20min  
**Buffer A** 0.05%TFA +2%CH<sub>3</sub>CN  
**Buffer B** 0.05%TFA +90%CH<sub>3</sub>CN

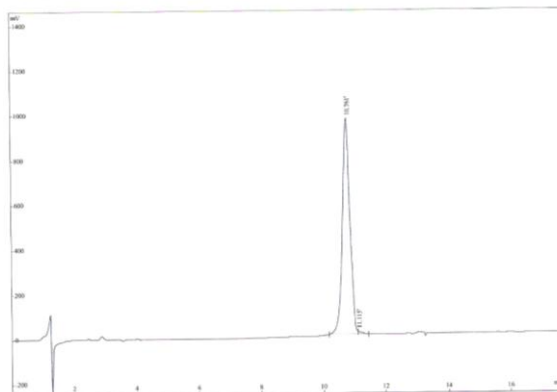

| Peak Results |        |       |          |
|--------------|--------|-------|----------|
| Rank         | Time   | Conc. | Area     |
| 1            | 10.761 | 99.46 | 16241834 |
| 2            | 11.115 | 0.54  | 88183    |
| Total        |        | 100   | 16330017 |

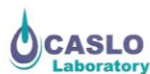

#### Mass Spectrometry Certificate

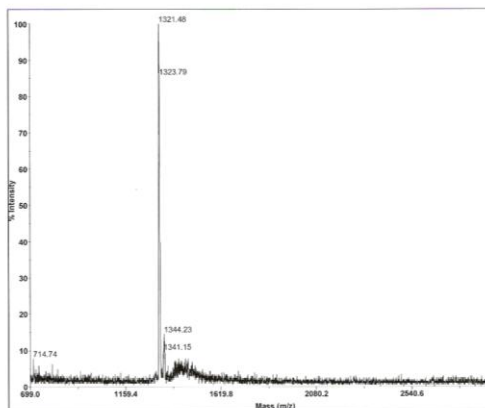

Lot No.: P220410-04-01  
Method: MALDI-TOF  
Main Peak: 1321.48  
MW [M+ H<sup>+</sup>]: 1321.48  
MW: 1320.48  
Theoretical MW: 1320.45  
Match: Approved  
Z=1

**Figure S1.** HPLC chromatogram and Maldi-TOF spectrum of L<sup>1</sup>

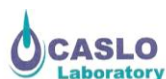

### HPLC Certificate

Lot No : P250310-04-01  
Column : 4,6×250mm,Sinohrom ODS-BP-5  
Solvent A : 0.1% trifluoroacetic in 100% acetonitrile  
Solvent B : 0.1% trifluoroacetic in 100% water  
Gradient :  

|         | A    | B    |
|---------|------|------|
| 0.01min | 17%  | 83%  |
| 25min   | 57%  | 43%  |
| 25.1min | 100% | 0%   |
| 30min   |      | STOP |

  
Flow rate : 1.0 mL/min  
Wavelength : 220nm  
Volume : 5ul

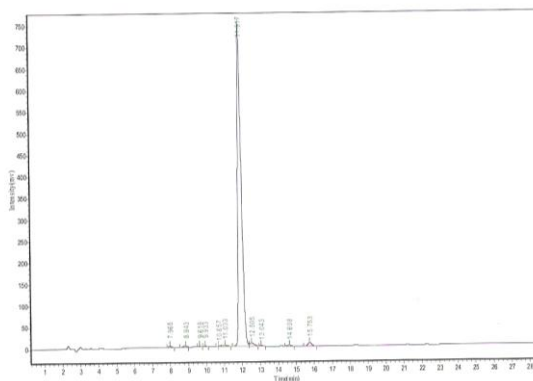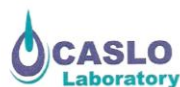

### Mass Spectrometry Certificate

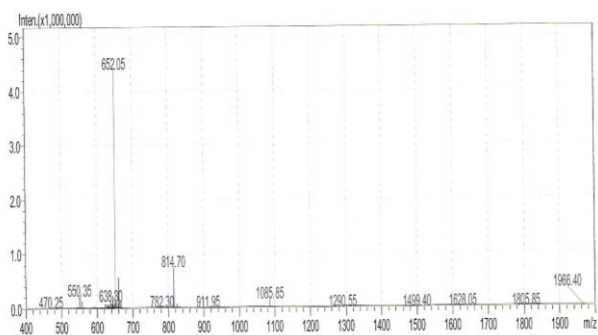

Lot No.: P250310-04-01  
Method: ESI  
Main Peak: 652.05  
MW [M+ 5H<sup>+</sup>]: 3260.25  
MW: 3255.25  
Theoretical MW: 3254.59  
Match: Approved  
Z=5

**Figure S2.** HPLC chromatogram and ESI-MS spectrum of L<sup>2</sup>

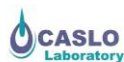

#### HPLC Certificate

Lot No. P311008-01-01  
PLC Column Merck (250×4.6mm I.D.) C18  
Detection wavelength 210 nm  
Gradient 0-30%B in 30min  
Buffer A 0.05%TFA +2%CH<sub>3</sub>CN  
Buffer B 0.05%TFA +90%CH<sub>3</sub>CN

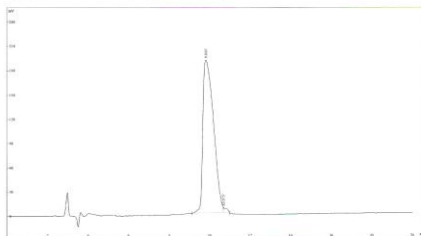

#### Peak Results

| Rank  | Time   | Conc. | Area    |
|-------|--------|-------|---------|
| 1     | 9.808  | 98.86 | 6918346 |
| 2     | 10.675 | 1.146 | 80219   |
| Total |        | 100   | 6998565 |

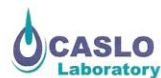

#### Mass Spectrometry Certificate

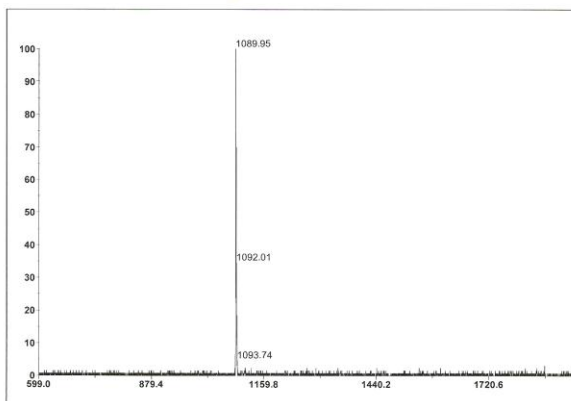

Lot No.: P311008-01-01  
Method: MALDI  
Main Peak: 1089.95  
MW [M+ H<sup>+</sup>]: 1089.95  
MW: 1088.95  
Theoretical MW: 1089.20  
Match: Approved  
Z=1

**Figure S3.** HPLC chromatogram and MALDI-TOF spectrum of L<sup>3</sup>

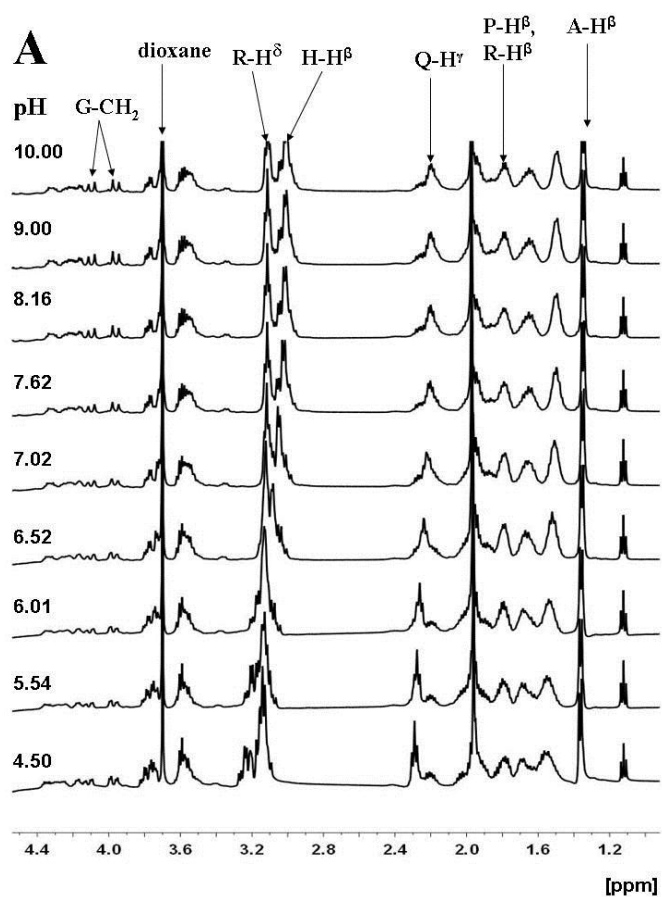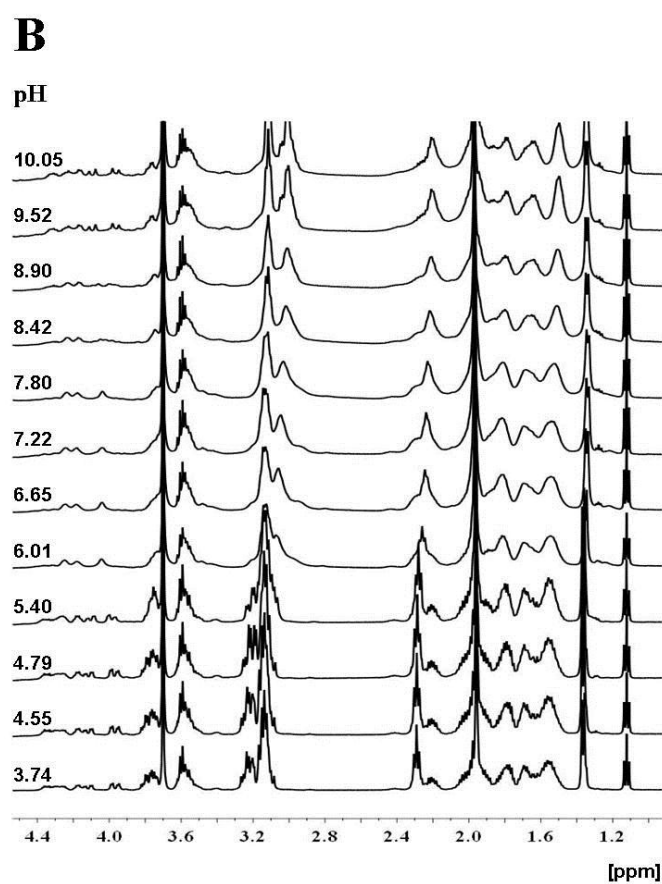

**Figure S4 :** The aliphatic part of the <sup>1</sup>H NMR spectra of **L**<sup>1</sup> as a function of pH in the absence (**A**) and presence (**B**) of zinc(II) (T = 298 K, [**L**<sup>1</sup>] = 0.0046 M, [Zn<sup>2+</sup>] = 0.00425 M).

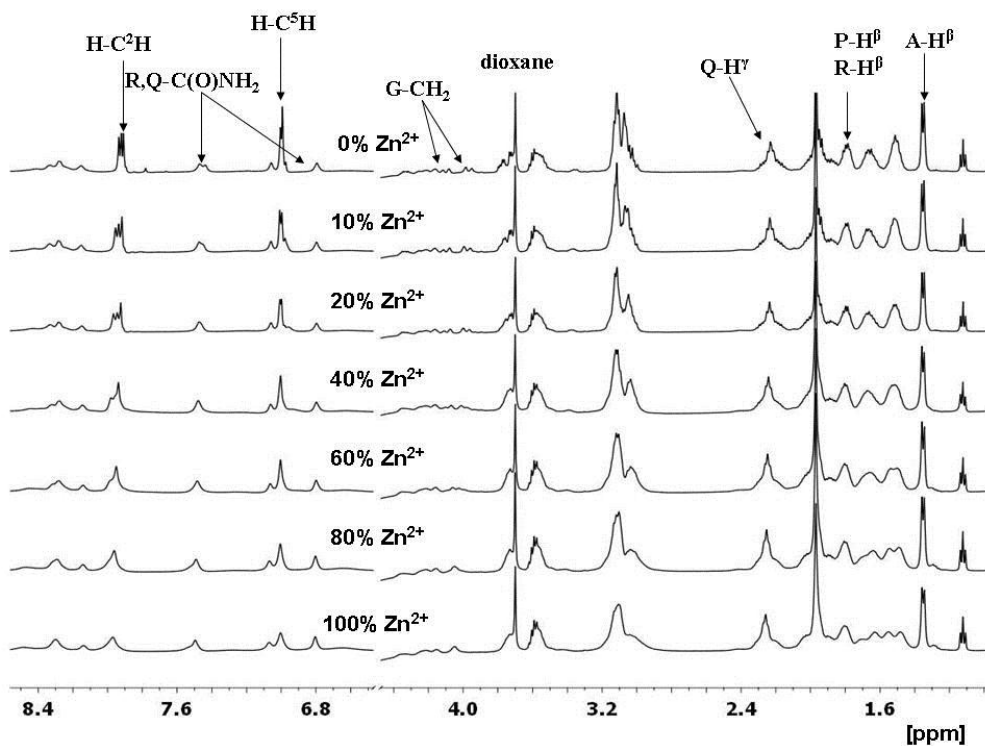

**Figure S5:** The <sup>1</sup>H NMR spectra of L<sup>1</sup> at pH = 7.0 as a function of zinc(II) concentration (T= 298 K).

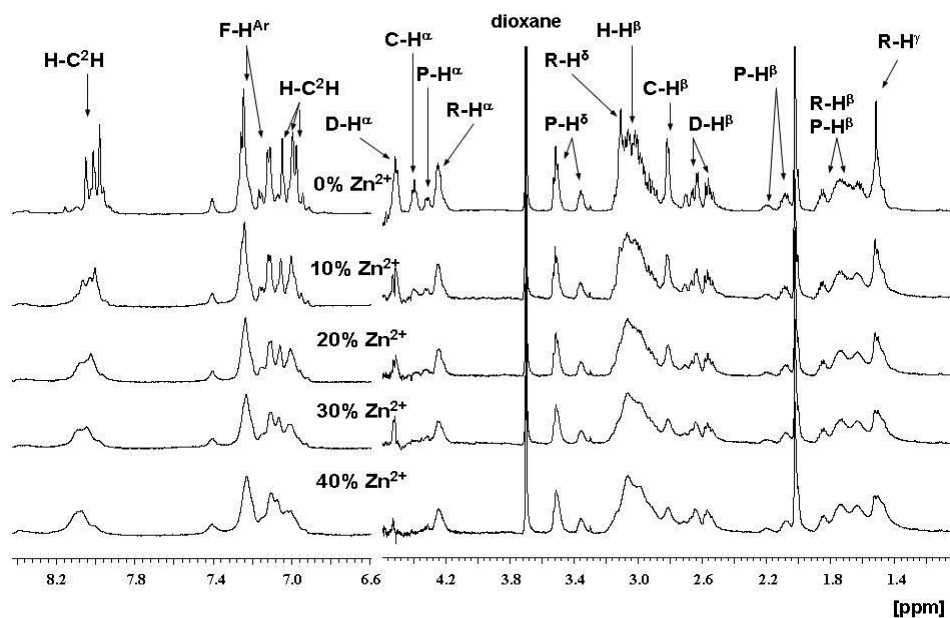

**Figure S6:** <sup>1</sup>H NMR spectra of L<sup>3</sup> as a function of zinc(II) concentration at pH = 7.0 (T=298 K)

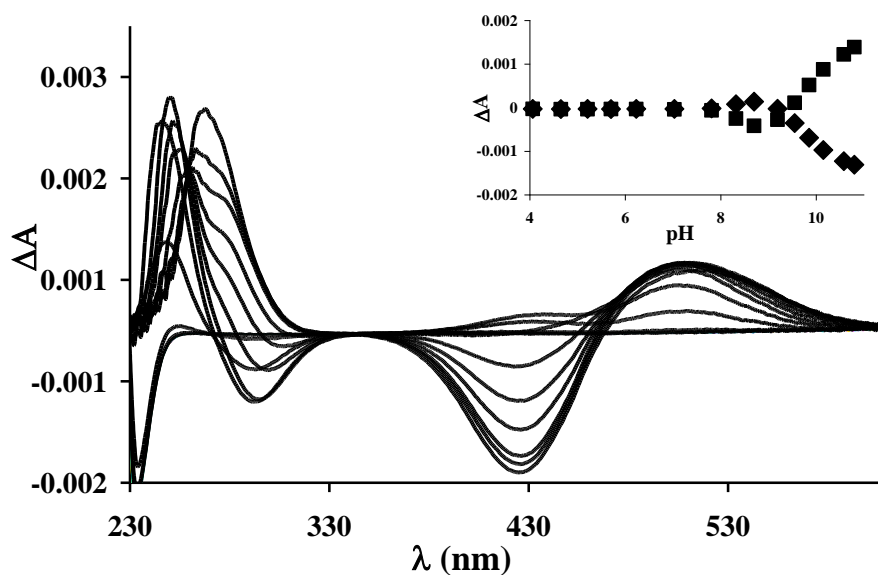

**Figure S7:** pH-dependent CD spectra of the nickel(II)- $L^1$  system ( $[L^1]= 0.0007$  M,  $[Ni^{2+}]= 0.00035$  M,  $T = 298$  K,  $I= 0.1$  M NaCl). The insert shows the pH dependence of the CD intensities at 280 (■) and 423 nm (▲).

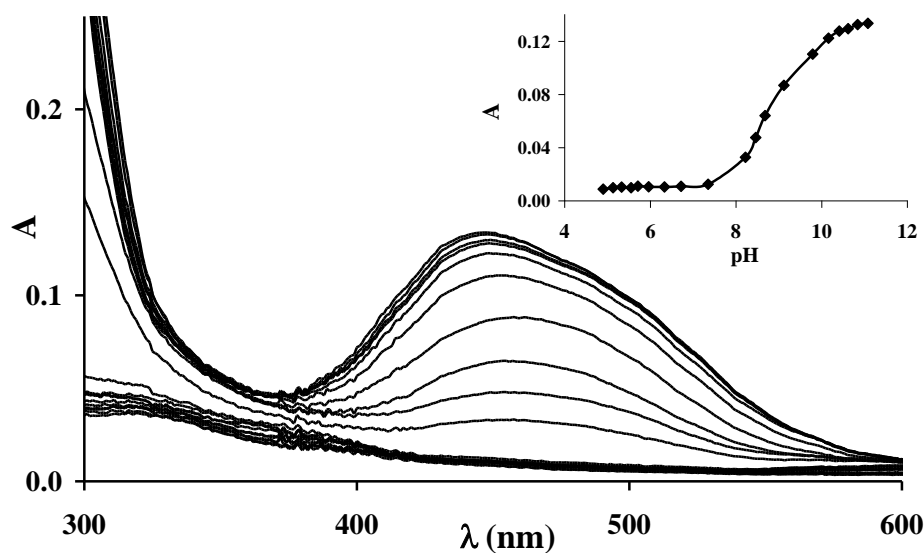

**Figure S8:** pH-dependent UV-Vis spectra of Ni(II)- $L^1$  system, and the absorption measured at 450 nm as a function of pH ( $[L^1]= 0.001$  M,  $[Ni^{2+}]= 0.0005$  M,  $T = 298$  K,  $I= 0.1$  M NaCl),

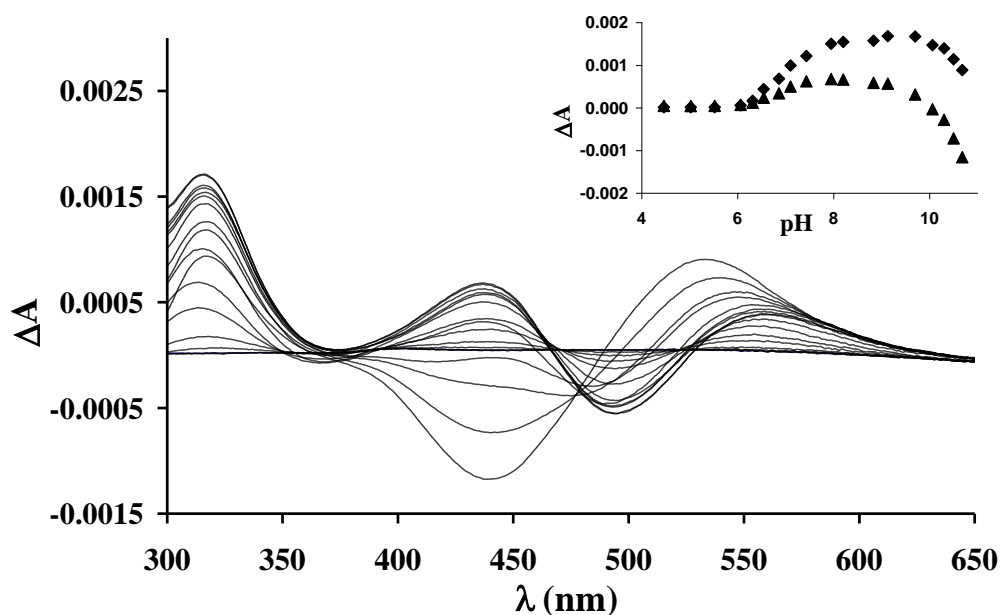

**Figure S9:** pH-dependent CD spectra of the nickel(II)- $L^3$  system ( $[L^3] = 0.0007$  M,  $[Ni^{2+}] = 0.0007$  M,  $T = 298$  K,  $I = 0.1$  M NaCl). The insert shows the pH dependence of the CD intensities at 312 (◆) and 435 nm (▲).

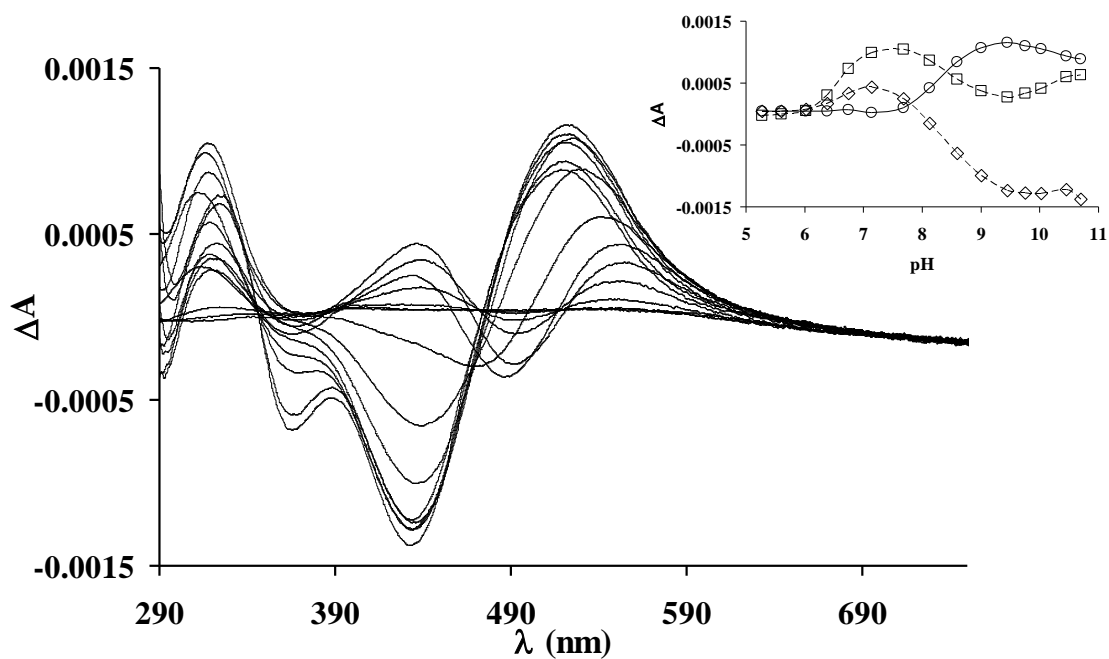

**Figure S10:** pH-dependent CD spectra of the nickel(II)- $L^3$  system ( $[L^3] = 0.00064$  M,  $[Ni^{2+}] = 0.00122$  M,  $T = 298$  K,  $I = 0.1$  M NaCl). The insert shows the pH dependence of the CD intensities at 316 (□), 433 (◇) and 520 (○) nm.



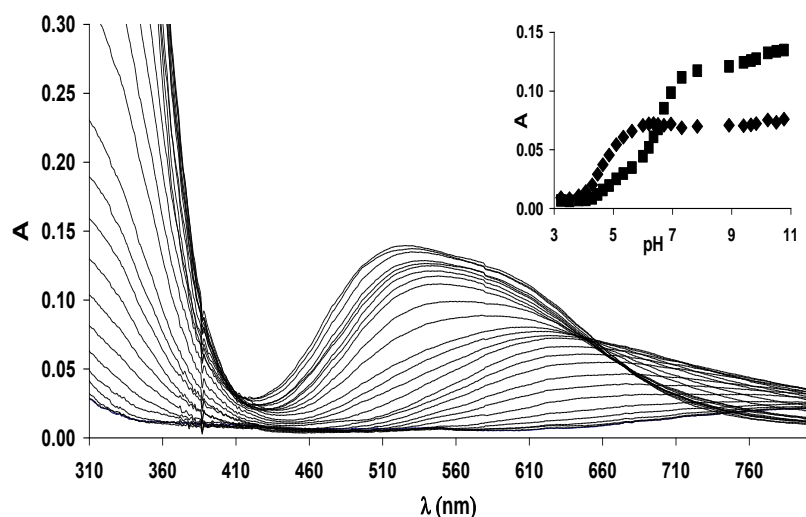

**Figure S11:** UV-Vis spectra of the copper(II)- $L^1$  system as a function of pH ( $[L^1]=0.0013$  M,  $[Cu^{2+}]=0.0013$  M,  $T=298$  K,  $I=0.1$  M NaCl). The insert shows the pH-dependence of absorbances at 550 (■) and 650 nm (◆).

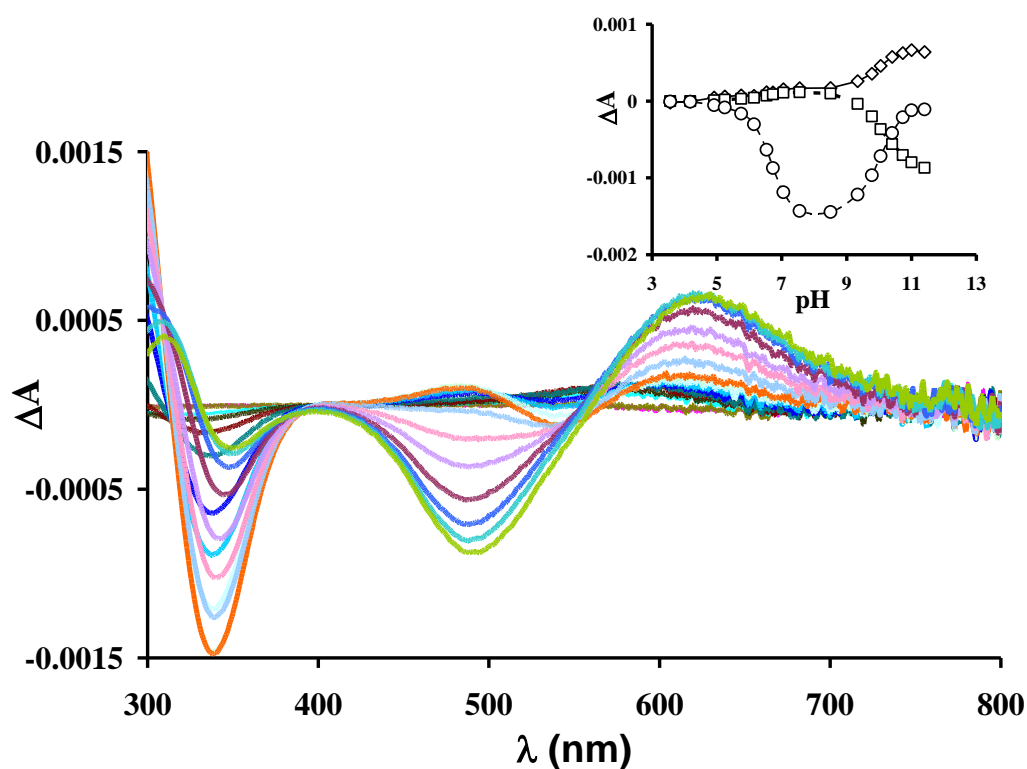

**Figure S12:** CD spectra of the copper(II)- $L^1$  system as a function of pH ( $[L^1]=[Cu^{2+}]=8\times 10^{-4}$  M,  $I=0.1$  M NaCl,  $T=298$  K, the insert shows the absorbances at  $\lambda=335$ (○), 490(□) and 620(◇) nm).

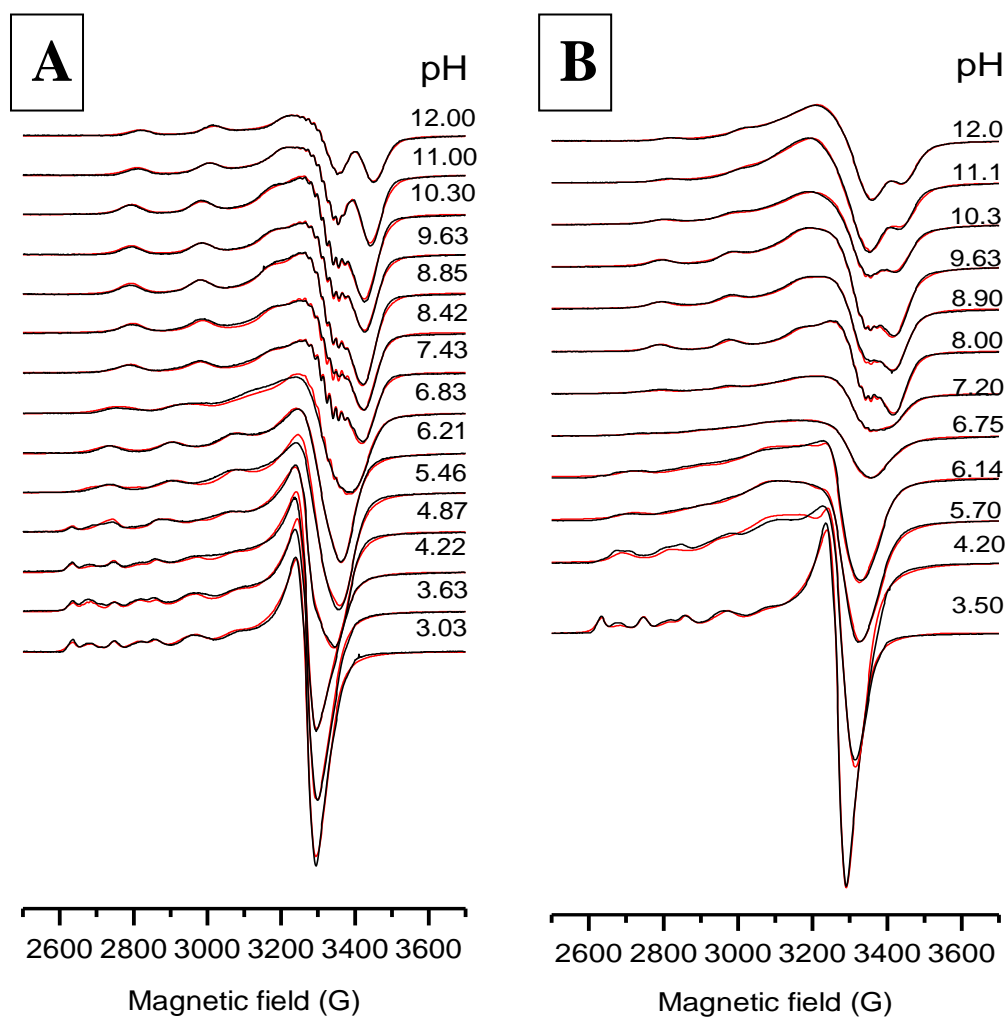

**Figure S13:** The measured (black) and calculated (red) anisotropic EPR spectra of the copper(II)-L1 system as a function of pH (A:  $[Cu^{2+}] = 0.00130$  M,  $[L^1] = 0.00131$  M; B:  $[Cu^{2+}] = 0.00213$  M,  $[L^1] = 0.00118$  M, T = 80 K).

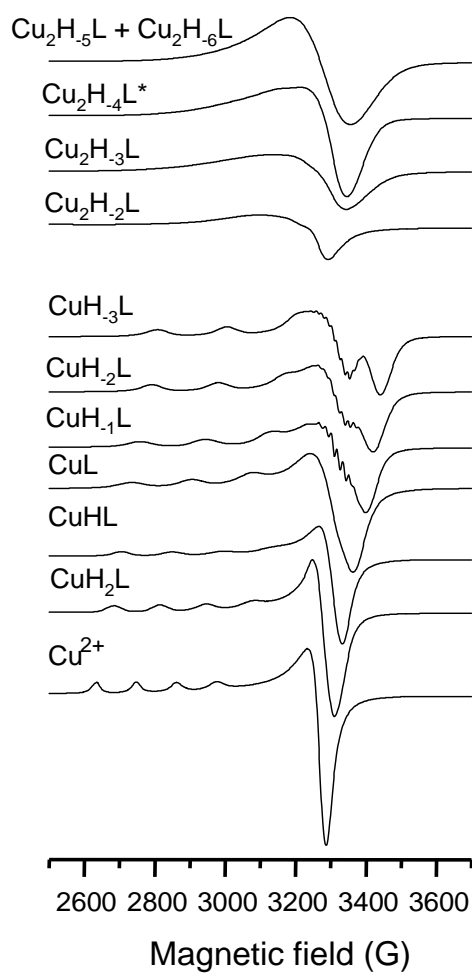

**Figure S14:** The calculated individual anisotropic EPR spectra of the specieses formed in the copper(II)- $\text{L}^1$  system

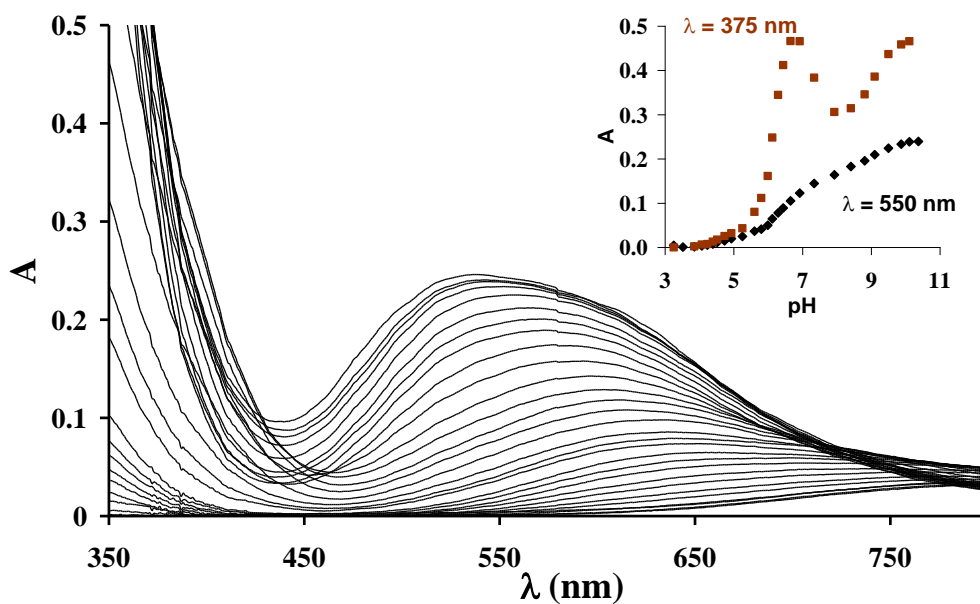

**Figure S15:** UV-Vis spectra of the copper(II)-L<sup>1</sup> system at 1:2 L<sup>1</sup>/Cu<sup>2+</sup> ratio as a function of pH ([Cu<sup>2+</sup>] = 0.00241 M, [L<sup>1</sup>] = 0.00127 M, T = 298 K, the insert shows the pH-dependence of the absorbances at 375 and 550 nm).

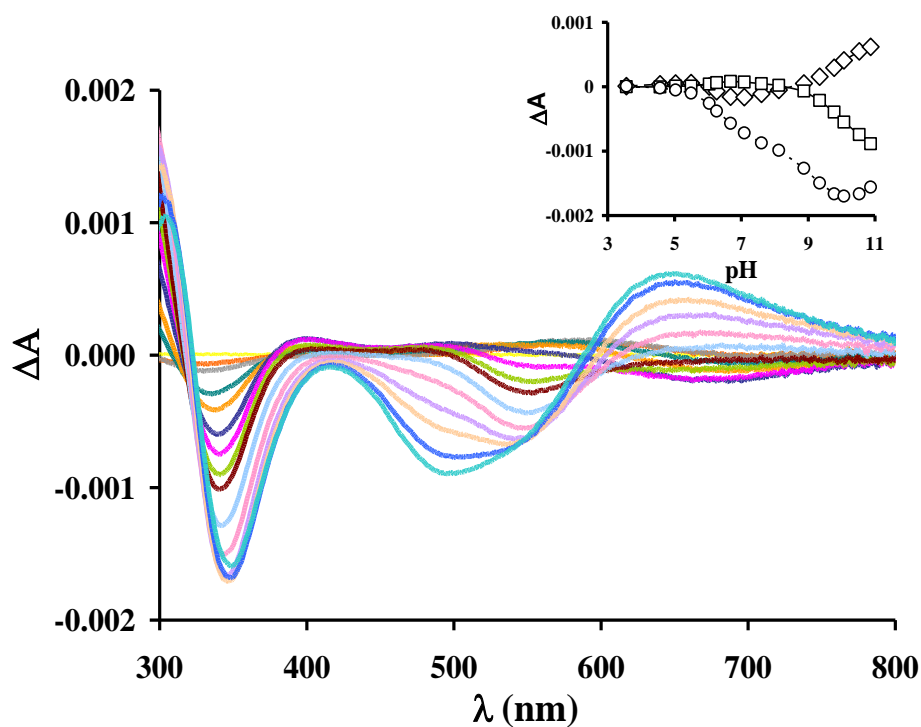

**Figure S16:** CD spectra of the copper(II)-L<sup>1</sup> system at 1:2 L<sup>1</sup>/Cu<sup>2+</sup> ratio as a function of pH pH ([L<sup>1</sup>] = 0.000697 M, [Cu<sup>2+</sup>] = 0.00132 M, I = 0.1 M NaCl, T = 298 K, the insert shows the absorbances at λ = 345(○), 490(□) and 645(◇) nm).
